# Supplementary material
Source: publisher figshare collection journal article supplement (https://springernature.figshare.com/ndownloader/files/7129709)
Supplement: Supplementary file [file 7129709]

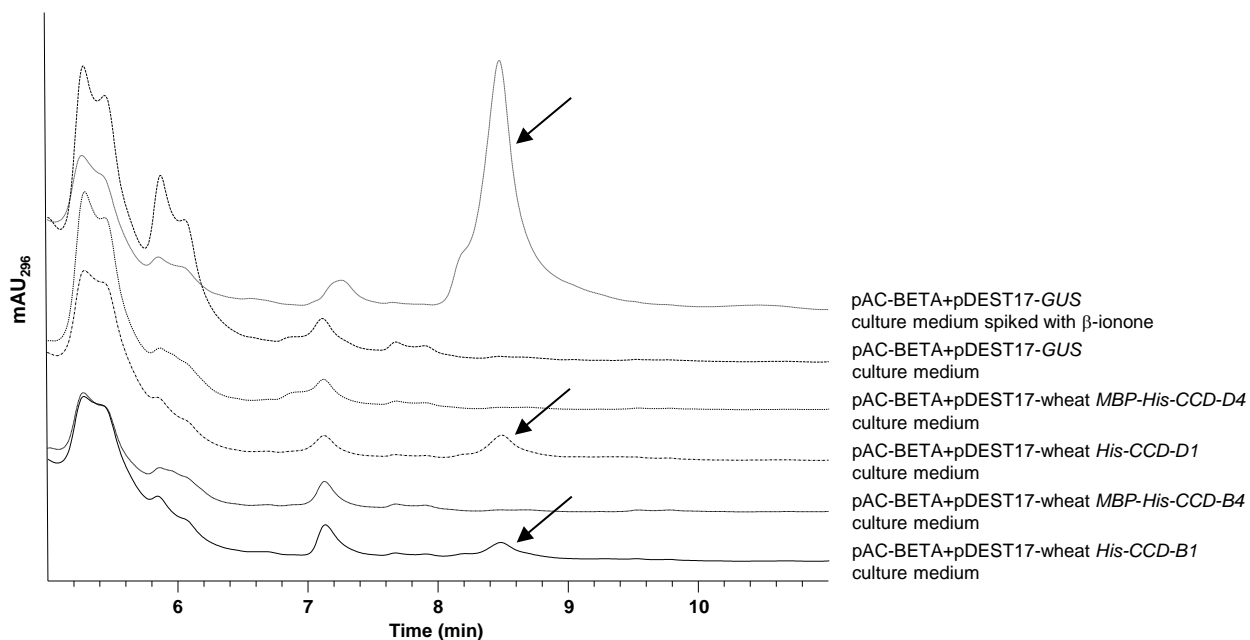

**Figure S5. Characterization of wheat CCD-B1, CCD-B4, CCD-D1 and CCD-D4 activities in  $\beta$ -carotene producing *E. coli* cells.** pAC-BETA contains all the genes for  $\beta$ -carotene biosynthesis. Total carotenoids extracted from growth media of *E. coli* cells co-expressing pAC-BETA and various plasmid constructs were analyzed by HPLC. The HPLC elution profiles between 5 and 11 min are shown. Ascending HPLC traces are offset by 12 s for clarity.  $\beta$ -ionone is indicated by arrow.
